# Supplementary material
Source: PubMed Central journal article supplement (PMC8084986)

| Variable         |                   | N     | Hazard ratio |  | p value           |        |
|------------------|-------------------|-------|--------------|--|-------------------|--------|
| <b>Age</b>       | <60               | 2770  |              |  | Reference         |        |
|                  | 60–69             | 8181  |              |  | 1.42 (1.24, 1.62) | <0.001 |
|                  | ≥70               | 8643  |              |  | 3.05 (2.65, 3.51) | <0.001 |
| <b>Stage</b>     | IB                | 14518 |              |  | Reference         |        |
|                  | II                | 5076  |              |  | 1.47 (1.36, 1.58) | <0.001 |
| <b>Grade</b>     | 1                 | 7134  |              |  | Reference         |        |
|                  | 2                 | 8314  |              |  | 1.50 (1.39, 1.63) | <0.001 |
|                  | 3                 | 4146  |              |  | 2.78 (2.56, 3.03) | <0.001 |
| <b>RT</b>        | RT                | 10423 |              |  | Reference         |        |
|                  | No RT             | 9171  |              |  | 1.43 (1.34, 1.53) | <0.001 |
| <b>Race</b>      | White             | 17063 |              |  | Reference         |        |
|                  | Black             | 1047  |              |  | 1.28 (1.12, 1.45) | <0.001 |
|                  | Hispanic          | 775   |              |  | 0.69 (0.56, 0.84) | <0.001 |
|                  | Asian             | 327   |              |  | 0.82 (0.62, 1.10) | 0.2    |
|                  | Others            | 382   |              |  | 0.95 (0.74, 1.20) | 0.6    |
| <b>Income</b>    | ≥\$63,000         | 6316  |              |  | Reference         |        |
|                  | \$48,000–\$62,999 | 5424  |              |  | 1.23 (1.13, 1.34) | <0.001 |
|                  | \$38,000–\$47,999 | 4812  |              |  | 1.29 (1.18, 1.41) | <0.001 |
|                  | <\$38,000         | 3042  |              |  | 1.37 (1.24, 1.52) | <0.001 |
| <b>Insurance</b> | Private           | 6895  |              |  | Reference         |        |
|                  | Medicare          | 11547 |              |  | 1.38 (1.26, 1.51) | <0.001 |
|                  | Medicaid          | 617   |              |  | 1.67 (1.37, 2.03) | <0.001 |
|                  | No insurance      | 535   |              |  | 1.09 (0.84, 1.42) | 0.5    |
| <b>Facility</b>  | Academic          | 7418  |              |  | Reference         |        |
|                  | Non-academic      | 12176 |              |  | 1.01 (0.94, 1.07) | 0.9    |
| <b>Distance</b>  | <10               | 9047  |              |  | Reference         |        |
|                  | 10–30             | 5748  |              |  | 0.97 (0.90, 1.05) | 0.5    |
|                  | >30               | 4799  |              |  | 0.98 (0.89, 1.07) | 0.6    |
| <b>Rurality</b>  | Non-Metro         | 3890  |              |  | Reference         |        |
|                  | Metropolitan      | 15704 |              |  | 1.05 (0.96, 1.16) | 0.3    |

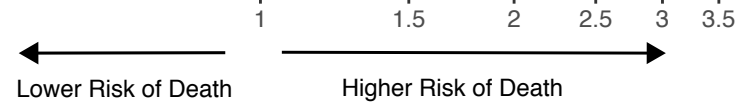

Supplement: NIHMS1669608-supplement-3.pdf [file NIHMS1669608-supplement-3.pdf]
