# Supplementary material
Source: PubMed Central journal article supplement (PMC8084986)

| Variable             |                   | N     | Hazard ratio |  | p value                  |
|----------------------|-------------------|-------|--------------|--|--------------------------|
| <b>Age</b>           | <60               | 2157  |              |  | Reference                |
|                      | 60–69             | 6012  |              |  | 1.56 (1.33, 1.84) <0.001 |
|                      | ≥70               | 6192  |              |  | 3.48 (2.94, 4.13) <0.001 |
| <b>Stage</b>         | IB                | 10609 |              |  | Reference                |
|                      | II                | 3752  |              |  | 1.45 (1.32, 1.59) <0.001 |
| <b>Grade</b>         | 1                 | 5224  |              |  | Reference                |
|                      | 2                 | 6087  |              |  | 1.64 (1.48, 1.81) <0.001 |
|                      | 3                 | 3050  |              |  | 3.23 (2.91, 3.59) <0.001 |
| <b>LN Assessment</b> | LN Examined       | 11925 |              |  | Reference                |
|                      | LN Not Examined   | 2436  |              |  | 1.58 (1.45, 1.74) <0.001 |
| <b>RT</b>            | No RT             | 6506  |              |  | Reference                |
|                      | RT                | 7855  |              |  | 0.72 (0.67, 0.78) <0.001 |
| <b>Race</b>          | White             | 12583 |              |  | Reference                |
|                      | Black             | 705   |              |  | 1.34 (1.14, 1.57) <0.001 |
|                      | Hispanic          | 525   |              |  | 0.70 (0.54, 0.91) 0.008  |
|                      | Asian             | 259   |              |  | 1.00 (0.73, 1.38) 0.992  |
|                      | Others            | 289   |              |  | 0.82 (0.60, 1.12) 0.211  |
| <b>Income</b>        | ≥\$63,000         | 4842  |              |  | Reference                |
|                      | \$48,000–\$62,999 | 4007  |              |  | 1.23 (1.11, 1.36) <0.001 |
|                      | \$38,000–\$47,999 | 3420  |              |  | 1.29 (1.16, 1.44) <0.001 |
|                      | <\$38,000         | 2092  |              |  | 1.27 (1.12, 1.45) <0.001 |
| <b>Insurance</b>     | Private           | 5384  |              |  | Reference                |
|                      | Medicare          | 8174  |              |  | 1.23 (1.10, 1.37) <0.001 |
|                      | Medicaid          | 402   |              |  | 1.50 (1.16, 1.93) 0.002  |
|                      | No insurance      | 401   |              |  | 1.15 (0.85, 1.55) 0.374  |
| <b>Facility</b>      | Academic          | 5404  |              |  | Reference                |
|                      | Non-academic      | 8957  |              |  | 1.04 (0.96, 1.13) 0.369  |
| <b>Distance</b>      | <10               | 6687  |              |  | Reference                |
|                      | 10–30             | 4227  |              |  | 0.98 (0.89, 1.07) 0.641  |
|                      | >30               | 3447  |              |  | 0.99 (0.88, 1.11) 0.866  |
| <b>Rurality</b>      | Non-Metro         | 2786  |              |  | Reference                |
|                      | Metropolitan      | 11575 |              |  | 1.09 (0.98, 1.22) 0.125  |

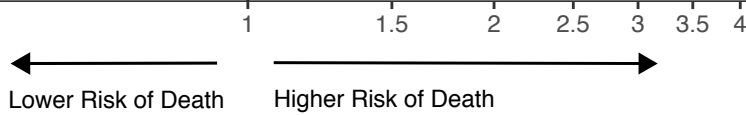

Supplement: NIHMS1669608-supplement-4.pdf [file NIHMS1669608-supplement-4.pdf]
