# Supplementary material
Source: PubMed Central journal article supplement (PMC8084986)
Supplement: NIHMS1669608-supplement-1.pdf [file NIHMS1669608-supplement-1.pdf]

| Variable         |                   | N     | Odds ratio |  | p value           |        |
|------------------|-------------------|-------|------------|--|-------------------|--------|
| <b>Age</b>       | <60               | 2770  |            |  | Reference         |        |
|                  | 60–69             | 8181  |            |  | 0.84 (0.75, 0.94) | 0.001  |
|                  | ≥70               | 8643  |            |  | 0.60 (0.53, 0.67) | <0.001 |
| <b>Stage</b>     | IB                | 14518 |            |  | Reference         |        |
|                  | II                | 5076  |            |  | 1.98 (1.84, 2.14) | <0.001 |
| <b>Grade</b>     | 1                 | 7134  |            |  | Reference         |        |
|                  | 2                 | 8314  |            |  | 1.39 (1.30, 1.48) | <0.001 |
|                  | 3                 | 4146  |            |  | 1.71 (1.58, 1.86) | <0.001 |
| <b>Race</b>      | White             | 17063 |            |  | Reference         |        |
|                  | Black             | 1047  |            |  | 0.79 (0.69, 0.91) | <0.001 |
|                  | Hispanic          | 775   |            |  | 0.75 (0.64, 0.87) | <0.001 |
|                  | Asian             | 327   |            |  | 0.76 (0.60, 0.95) | 0.017  |
|                  | Others            | 382   |            |  | 0.73 (0.59, 0.90) | 0.003  |
| <b>Income</b>    | ≥\$63,000         | 6316  |            |  | Reference         |        |
|                  | \$48,000–\$62,999 | 5424  |            |  | 0.96 (0.89, 1.03) | 0.274  |
|                  | \$38,000–\$47,999 | 4812  |            |  | 0.93 (0.85, 1.01) | 0.070  |
|                  | <\$38,000         | 3042  |            |  | 0.82 (0.75, 0.90) | <0.001 |
| <b>Insurance</b> | Private           | 6895  |            |  | Reference         |        |
|                  | Medicare          | 11547 |            |  | 0.97 (0.90, 1.05) | 0.439  |
|                  | Medicaid          | 617   |            |  | 1.09 (0.92, 1.31) | 0.313  |
|                  | No insurance      | 535   |            |  | 0.78 (0.65, 0.94) | 0.010  |
| <b>Facility</b>  | Academic          | 7418  |            |  | Reference         |        |
|                  | Non-academic      | 12176 |            |  | 0.80 (0.75, 0.85) | <0.001 |
| <b>Distance</b>  | <10               | 9047  |            |  | Reference         |        |
|                  | 10–30             | 5748  |            |  | 0.80 (0.74, 0.85) | <0.001 |
|                  | >30               | 4799  |            |  | 0.47 (0.43, 0.51) | <0.001 |
| <b>Rurality</b>  | Non-Metro         | 3890  |            |  | Reference         |        |
|                  | Metropolitan      | 15704 |            |  | 0.81 (0.74, 0.88) | <0.001 |

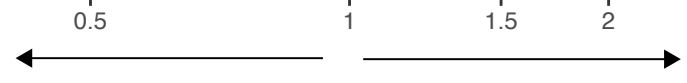

← More Omission of Adjuvant RT      More Receipt of Adjuvant RT →
