# Supplementary material
Source: PubMed Central journal article supplement (PMC8084986)
Supplement: NIHMS1669608-supplement-2.pdf [file NIHMS1669608-supplement-2.pdf]

| Variable             |                   | N     | Odds ratio        | p value |
|----------------------|-------------------|-------|-------------------|---------|
| <b>Age</b>           | <60               | 2157  | Reference         |         |
|                      | 60–69             | 6012  | 0.91 (0.81, 1.03) | 0.151   |
|                      | ≥70               | 6192  | 0.66 (0.57, 0.75) | <0.001  |
| <b>Stage</b>         | IB                | 10609 | Reference         |         |
|                      | II                | 3752  | 2.11 (1.93, 2.31) | <0.001  |
| <b>Grade</b>         | 1                 | 5224  | Reference         |         |
|                      | 2                 | 6087  | 1.40 (1.30, 1.52) | <0.001  |
|                      | 3                 | 3050  | 1.74 (1.58, 1.91) | <0.001  |
| <b>LN Assessment</b> | LN Examined       | 11925 | Reference         |         |
|                      | LN Not Examined   | 2436  | 0.93 (0.84, 1.01) | 0.096   |
| <b>Race</b>          | White             | 12583 | Reference         |         |
|                      | Black             | 705   | 0.76 (0.65, 0.90) | 0.001   |
|                      | Hispanic          | 525   | 0.74 (0.62, 0.89) | 0.002   |
|                      | Asian             | 259   | 0.76 (0.59, 0.99) | 0.038   |
|                      | Others            | 289   | 0.78 (0.61, 0.99) | 0.040   |
| <b>Income</b>        | ≥\$63,000         | 4842  | Reference         |         |
|                      | \$48,000–\$62,999 | 4007  | 0.98 (0.89, 1.07) | 0.598   |
|                      | \$38,000–\$47,999 | 3420  | 0.95 (0.87, 1.05) | 0.346   |
|                      | <\$38,000         | 2092  | 0.85 (0.76, 0.96) | 0.007   |
| <b>Insurance</b>     | Private           | 5384  | Reference         |         |
|                      | Medicare          | 8174  | 0.99 (0.91, 1.08) | 0.858   |
|                      | Medicaid          | 402   | 1.12 (0.90, 1.39) | 0.308   |
|                      | No insurance      | 401   | 0.78 (0.63, 0.97) | 0.025   |
| <b>Facility</b>      | Academic          | 5404  | Reference         |         |
|                      | Non-academic      | 8957  | 0.79 (0.74, 0.85) | <0.001  |
| <b>Distance</b>      | <10               | 6687  | Reference         |         |
|                      | 10–30             | 4227  | 0.81 (0.75, 0.88) | <0.001  |
|                      | >30               | 3447  | 0.48 (0.43, 0.53) | <0.001  |
| <b>Rurality</b>      | Non-Metro         | 2786  | Reference         |         |
|                      | Metropolitan      | 11575 | 0.79 (0.71, 0.87) | <0.001  |

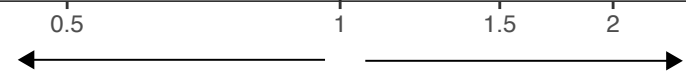

More Omission of Adjuvant RT      More Receipt of Adjuvant RT
